# Supplementary material
Source: PubMed Central journal article supplement (PMC4653103)
Supplement: supp_WNL.0000000000002121_Tables.pdf [file supp_WNL.0000000000002121_Tables.pdf]

Supplementary Table e-1. Characteristics of the study population by tertiles of total brain volume and mean cortical thickness.

|                                    | Total          | TBV tertiles                    |                               |                                |                  | Mean CT tertiles               |                               |                                |                   |
|------------------------------------|----------------|---------------------------------|-------------------------------|--------------------------------|------------------|--------------------------------|-------------------------------|--------------------------------|-------------------|
|                                    |                | Low<br>(N=224)                  | Middle<br>(N=225)             | High<br>(N=225)                | p                | Low<br>(N=224)                 | Middle<br>(N=225)             | High<br>(N=225)                | p                 |
| Age (years), mean(SD)              | 80.07<br>(5.6) | <b>81.46</b><br><b>(5.65)</b>   | <b>79.98</b><br><b>(5.64)</b> | <b>78.78</b><br><b>(5.12)</b>  | <b>&lt;0.001</b> | <b>80.86</b><br><b>(5.97)</b>  | <b>79.85</b><br><b>(5.56)</b> | <b>79.5</b><br><b>(5.11)</b>   | <b>0.027</b>      |
| Education(years), mean(SD)         | 10.71<br>(4.8) | <b>9.96</b><br><b>(4.90)</b>    | <b>10.88</b><br><b>(4.86)</b> | <b>11.29</b><br><b>(4.45)</b>  | <b>0.010</b>     | 10.71<br>(4.41)                | 10.61<br>(4.84)               | 10.82<br>(5.04)                | 0.903             |
| Energy intake(Cal), mean(SD)       | 1400<br>(533)  | 1372<br>(509)                   | 1406<br>(508)                 | 1421<br>(579)                  | 0.600            | 1386<br>(534)                  | 1412<br>(490)                 | 1400<br>(572)                  | 0.880             |
| APOE ε4+, N (%)                    | 163 (25)       | 52 (24)                         | 58 (26)                       | 53 (24)                        | 0.790            | 48 (22)                        | 63( 28)                       | 52 (24)                        | 0.260             |
| Female, N (%)                      | 454 (67)       | <b>152 (68)</b>                 | <b>164 (73)</b>               | <b>138 (61)</b>                | <b>0.030</b>     | <b>125 (56)</b>                | <b>158 (70)</b>               | <b>171 (76)</b>                | <b>&lt;0.0001</b> |
| Ethnicity, N (%)                   |                |                                 |                               |                                | 0.510            |                                |                               |                                | <b>&lt;0.0001</b> |
| White                              | 187 (28)       | 58 (26)                         | 66 (29)                       | 63 (28)                        |                  | <b>50 (22)</b>                 | <b>65 (29)</b>                | <b>72 (32)</b>                 |                   |
| Black                              | 235 (35)       | 74 (33)                         | 72 (32)                       | 89 (40)                        |                  | <b>101 (45)</b>                | <b>71 (32)</b>                | <b>63 (28)</b>                 |                   |
| Hispanics                          | 239 (35)       | 88 (39)                         | 82 (36)                       | 69 (31)                        |                  | <b>64 (29)</b>                 | <b>85 (38)</b>                | <b>90 (40)</b>                 |                   |
| Others                             | 13 (2)         | 4 (2)                           | 5 (2)                         | 4 (2)                          |                  | <b>9 (4)</b>                   | <b>4 (2)</b>                  | <b>0 (0)</b>                   |                   |
| Stroke, N (%)                      | 70 (11)        | 19 (8.6)                        | 27 (12)                       | 27 (11)                        | 0.460            | 19 (8.6)                       | 25 (11)                       | 26 (12)                        | 0.540             |
| Diabetes, N (%)                    | 139 (21)       | <b>58 (26)</b>                  | <b>43 (20)</b>                | <b>38 (17)</b>                 | <b>0.050</b>     | <b>63 (29)</b>                 | <b>45 (20)</b>                | <b>31 (14)</b>                 | <b>0.001</b>      |
| Hypertension, N (%)                | 491 (74)       | 163 (74)                        | 163 (74)                      | 165 (73)                       | 0.980            | 165 (75)                       | 157 (71)                      | 169 (75)                       | 0.460             |
| Heart Disease, N (%)               | 139 (21)       | 52 (24)                         | 47 (22)                       | 40 (18)                        | 0.320            | 56 (26)                        | 37 (17)                       | 46 (21)                        | 0.080             |
| BMI (kg/m <sup>2</sup> ), mean(SD) | 27.8<br>(5.6)  | <b>28.62</b><br><b>(6.44)</b>   | <b>27.07</b><br><b>(4.93)</b> | <b>27.77</b><br><b>(5.14)</b>  | <b>0.015</b>     | <b>27.87</b><br><b>(5.93)</b>  | <b>28.51</b><br><b>(5.73)</b> | <b>27.1</b><br><b>(4.96)</b>   | <b>0.031</b>      |
| Language, mean(SD)                 | 0.32<br>(0.63) | <b>0.17</b><br><b>(0.62)</b>    | <b>0.36</b><br><b>(0.62)</b>  | <b>0.42</b><br><b>(0.64)</b>   | <b>&lt;0.001</b> | <b>0.26</b><br><b>(0.64)</b>   | <b>0.29</b><br><b>(0.62)</b>  | <b>0.4</b><br><b>(0.64)</b>    | <b>0.041</b>      |
| Memory, mean(SD)                   | 0.14<br>(0.73) | <b>0.02</b><br><b>(0.71)</b>    | <b>0.20</b><br><b>(0.73)</b>  | <b>0.19</b><br><b>(0.73)</b>   | <b>0.014</b>     | <b>0.04</b><br><b>(0.73)</b>   | <b>0.1</b><br><b>(0.74)</b>   | <b>0.29</b><br><b>(0.69)</b>   | <b>0.001</b>      |
| Speed, mean(SD)                    | 0.21<br>(1.00) | <b>0.00</b><br><b>(1.01)</b>    | <b>0.25</b><br><b>(0.95)</b>  | <b>0.34</b><br><b>(1.03)</b>   | <b>0.002</b>     | 0.08<br>(1.02)                 | 0.29<br>(0.98)                | 0.25<br>(1.01)                 | 0.089             |
| Visuospatial, mean(SD)             | 0.29<br>(0.58) | <b>0.07</b><br><b>(0.64)</b>    | <b>0.38</b><br><b>(0.51)</b>  | <b>0.41</b><br><b>(0.54)</b>   | <b>&lt;0.001</b> | 0.24<br>(0.59)                 | 0.28<br>(0.58)                | 0.35<br>(0.57)                 | 0.118             |
| Mean Cognition, mean(SD)           | 0.23<br>(0.59) | <b>0.05</b><br><b>(0.6)</b>     | <b>0.29</b><br><b>(0.54)</b>  | <b>0.34</b><br><b>(0.59)</b>   | <b>&lt;0.001</b> | <b>0.14</b><br><b>(0.61)</b>   | <b>0.23</b><br><b>(0.58)</b>  | <b>0.31</b><br><b>(0.57)</b>   | <b>0.005</b>      |
| CDR =0.5                           | 221 (33)       | <b>91 (41)</b>                  | <b>68 (30)</b>                | <b>62 (28)</b>                 | <b>0.008</b>     | <b>83 (37)</b>                 | <b>82 (36)</b>                | <b>56 (24)</b>                 | <b>0.008</b>      |
| MeDi, mean(SD)                     | 4.26<br>(1.71) | <b>4.10</b><br><b>(1.64)</b>    | <b>4.17</b><br><b>(1.72)</b>  | <b>4.52</b><br><b>(1.75)</b>   | <b>0.021</b>     | 4.31<br>(1.74)                 | 4.17<br>(1.64)                | 4.3<br>(1.75)                  | 0.641             |
| MeDi High, N(%)                    | 304 (45)       | <b>81 (36)</b>                  | <b>104 (46)</b>               | <b>119 (53)</b>                | <b>0.002</b>     | 109 (49)                       | 90 (40)                       | 105 (47)                       | 0.160             |
| mCT (mm), mean(SD)                 | 2.46<br>(0.12) | 2.45<br>(0.12)                  | 2.46<br>(0.11)                | 2.46<br>(0.11)                 | 0.194            | <b>2.33</b><br><b>(0.08)</b>   | <b>2.46</b><br><b>(0.03)</b>  | <b>2.58</b><br><b>(0.06)</b>   | <b>&lt;0.001</b>  |
| TBV (ml), mean(SD)                 | 0 (62.79)      | <b>-65.67</b><br><b>(40.95)</b> | <b>0.94</b><br><b>(12.4)</b>  | <b>64.44</b><br><b>(39.23)</b> | <b>&lt;0.001</b> | -5.99<br>(70.09)               | 6.48<br>(60.09)               | -0.52<br>(57.16)               | 0.108             |
| TGMV (ml), mean(SD)                | 0 (35.36)      | <b>-28.72</b><br><b>(30.33)</b> | <b>1.94</b><br><b>(22.66)</b> | <b>26.66</b><br><b>(28.01)</b> | <b>&lt;0.001</b> | <b>-18.92</b><br><b>(34.9)</b> | <b>3.61</b><br><b>(29.4)</b>  | <b>15.23</b><br><b>(32.8)</b>  | <b>&lt;0.001</b>  |
| TWMV(ml), mean(SD)                 | 0 (42.66)      | <b>-37.68</b><br><b>(31.65)</b> | <b>5.2</b><br><b>(24.2)</b>   | <b>36.34</b><br><b>(33.44)</b> | <b>&lt;0.001</b> | <b>3.84</b><br><b>(44.11)</b>  | <b>6.33</b><br><b>(41.84)</b> | <b>-6.13</b><br><b>(41.16)</b> | <b>0.005</b>      |

Abbreviations: Clinical Dementia Rating(CDR), total brain volume (TBV), total gray matter volume (TGMV), total white matter volume (TWMV), and mean cortical thickness (mCT).

Supplementary Table e-2. Cross-sectional association between MeDi components and global brain measures.

| MeDi Components*                                                                                                            | TBV (ml)     |             | TGMV (ml)    |               | TWMV (ml) |      | mCT (mm)     |             |
|-----------------------------------------------------------------------------------------------------------------------------|--------------|-------------|--------------|---------------|-----------|------|--------------|-------------|
|                                                                                                                             | B            | P           | B            | P             | B         | P    | B            | P           |
| <i>Model 1: Unadjusted</i>                                                                                                  |              |             |              |               |           |      |              |             |
| Fruit, High vs. low                                                                                                         | -0.98        | 0.85        | -3.37        | 0.24          | 0.23      | 0.95 | -0.006       | 0.55        |
| Vegetable, High vs. low                                                                                                     | 4.31         | 0.39        | 0.41         | 0.89          | -0.14     | 0.97 | -0.004       | 0.66        |
| <b>Fish High, vs. low</b>                                                                                                   | 8.64         | 0.08        | <b>7.35</b>  | <b>0.008</b>  | 3.54      | 0.30 | <b>0.018</b> | <b>0.04</b> |
| Legume, High vs. low                                                                                                        | 0.36         | 0.94        | -1.55        | 0.58          | 0.64      | 0.85 | 0.001        | 0.91        |
| cereal, High vs. low                                                                                                        | -4.65        | 0.35        | -1.78        | 0.52          | -0.31     | 0.93 | 0.000        | 0.97        |
| MUFA/SFA, High vs. low                                                                                                      | 3.16         | 0.82        | 0.49         | 0.95          | 10.60     | 0.26 | -0.008       | 0.74        |
| Dairy, Low vs. high                                                                                                         | 4.32         | 0.42        | 0.61         | 0.84          | 0.84      | 0.82 | -0.013       | 0.18        |
| <b>Meat, Low vs. high</b>                                                                                                   | <b>10.23</b> | <b>0.04</b> | <b>7.97</b>  | <b>0.004</b>  | 3.88      | 0.25 | 0.016        | 0.08        |
| <b>Moderate Alcohol</b>                                                                                                     | <b>14.65</b> | <b>0.01</b> | <b>9.00</b>  | <b>0.004</b>  | 5.95      | 0.12 | 0.000        | 0.96        |
| <i>Adjusted for age only</i>                                                                                                |              |             |              |               |           |      |              |             |
| Fruit, High vs. low                                                                                                         | 0.04         | 0.99        | -2.53        | 0.35          | 1.05      | 0.75 | -0.004       | 0.65        |
| Vegetable, High vs. low                                                                                                     | 3.84         | 0.44        | 0.01         | 0.99          | -0.55     | 0.87 | -0.005       | 0.60        |
| <b>Fish High, vs. low</b>                                                                                                   | 8.05         | 0.10        | <b>6.76</b>  | <b>0.01</b>   | 2.93      | 0.36 | 0.017        | 0.06        |
| Legume, High vs. low                                                                                                        | 2.6          | 0.59        | 0.4          | 0.88          | 2.69      | 0.41 | 0.005        | 0.61        |
| cereal, High vs. low                                                                                                        | -5.35        | 0.27        | -2.24        | 0.39          | -1.07     | 0.74 | 0.005        | 0.99        |
| MUFA/SFA, High vs. low                                                                                                      | -0.94        | 0.86        | 0.04         | 0.99          | 1.73      | 0.62 | 0.001        | 0.90        |
| Dairy, Low vs. high                                                                                                         | 5.42         | 0.30        | 0.86         | 0.76          | 2.13      | 0.54 | -0.015       | 0.12        |
| <b>Meat, Low vs. high</b>                                                                                                   | <b>10.92</b> | <b>0.02</b> | <b>8.68</b>  | <b>0.001</b>  | 4.53      | 0.16 | <b>0.017</b> | <b>0.05</b> |
| <b>Moderate Alcohol</b>                                                                                                     | <b>12.7</b>  | <b>0.02</b> | <b>7.26</b>  | <b>0.02</b>   | 3.95      | 0.28 | -0.003       | 0.79        |
| <i>Adjusted for age, sex, education, ethnicity, BMI, diabetes, and mean cognition.</i>                                      |              |             |              |               |           |      |              |             |
| Fruit, High vs. low                                                                                                         | -2.36        | 0.64        | -4.68        | 0.08          | 1.81      | 0.73 | -0.009       | 0.35        |
| Vegetable, High vs. low                                                                                                     | 3.79         | 0.46        | 1.31         | 0.62          | -0.40     | 0.91 | -0.001       | 0.88        |
| <b>Fish High, vs. low</b>                                                                                                   | 9.18         | 0.06        | <b>7.06</b>  | <b>0.006</b>  | 4.21      | 0.20 | <b>0.019</b> | <b>0.03</b> |
| Legume, High vs. low                                                                                                        | 2.44         | 0.64        | -1.17        | 0.66          | 0.76      | 0.82 | 0.002        | 0.83        |
| cereal, High vs. low                                                                                                        | -4.95        | 0.33        | -3.49        | 0.19          | -1.93     | 0.57 | -0.005       | 0.60        |
| MUFA/SFA, High vs. low                                                                                                      | -5.45        | 0.70        | -4.45        | 0.54          | 5.60      | 0.55 | -0.005       | 0.84        |
| Dairy, Low vs. high                                                                                                         | 6.79         | 0.21        | 1.94         | 0.49          | 2.81      | 0.44 | -0.009       | 0.38        |
| <b>Meat, Low vs. high</b>                                                                                                   | <b>12.20</b> | <b>0.02</b> | <b>8.42</b>  | <b>0.002</b>  | 3.67      | 0.28 | 0.011        | 0.22        |
| Moderate Alcohol                                                                                                            | 8.26         | 0.16        | 4.64         | 0.13          | 1.98      | 0.61 | -0.006       | 0.56        |
| <i>Excluding MCI subjects<sup>  </sup>. Adjusted for age, sex, education, ethnicity, BMI, diabetes, and mean cognition.</i> |              |             |              |               |           |      |              |             |
| Fruit, High vs. low                                                                                                         | 0.52         | 0.93        | -3.29        | 0.29          | 3.00      | 0.45 | -0.004       | 0.68        |
| Vegetable, High vs. low                                                                                                     | 8.75         | 0.14        | 2.87         | 0.35          | 2.73      | 0.49 | -0.002       | 0.84        |
| <b>Fish High, vs. low</b>                                                                                                   | 7.19         | 0.21        | <b>8.67</b>  | <b>0.004</b>  | 3.26      | 0.40 | <b>0.028</b> | <b>0.01</b> |
| Legume, High vs. low                                                                                                        | -0.20        | 0.97        | -0.52        | 0.87          | 0.17      | 0.97 | 0.005        | 0.66        |
| cereal, High vs. low                                                                                                        | 0.12         | 0.98        | -2.35        | 0.44          | -0.27     | 0.95 | -0.005       | 0.64        |
| MUFA/SFA, High vs. low                                                                                                      | -9.88        | 0.53        | -1.69        | 0.84          | 4.04      | 0.70 | -0.001       | 0.98        |
| Dairy, Low vs. high                                                                                                         | 6.70         | 0.28        | 2.19         | 0.50          | 3.29      | 0.43 | -0.011       | 0.35        |
| <b>Meat, Low vs. high</b>                                                                                                   | <b>15.61</b> | <b>0.01</b> | <b>11.37</b> | <b>0.0002</b> | 4.01      | 0.30 | 0.014        | 0.17        |
| Moderator Alcohol                                                                                                           | 2.50         | 0.71        | 2.90         | 0.41          | -1.43     | 0.75 | -0.008       | 0.50        |

\*All food components entered into model at the same time. A P-value less than 0.05 was considered significant and indicated in bold. <sup>||</sup> Excluding 159 MCI subject, 23 subjects whose cognitive data were insufficient for MCI diagnosis, and 14 subjects without APOE. Model based on 478 remaining subjects. Abbreviations: total brain volume (TBV), total gray matter volume (TGMV), total white matter volume (TWMV), and mean cortical thickness (mCT).

Supplementary Table e-3. Cross-sectional association between Mediterranean diet components and regional gray matter volumes or thickness.

| <i>Food components*</i>                                                                         | <b>Cingulate</b> |               | <b>Parietal</b> |             | <b>Temporal</b> |              | <b>Hippocampus</b> |             | <b>Superior-frontal CT</b> |              |
|-------------------------------------------------------------------------------------------------|------------------|---------------|-----------------|-------------|-----------------|--------------|--------------------|-------------|----------------------------|--------------|
|                                                                                                 | b                | <i>p</i>      | b               | <i>p</i>    | b               | <i>p</i>     | b                  | <i>p</i>    | b                          | <i>p</i>     |
| <i>Model 1: unadjusted</i>                                                                      |                  |               |                 |             |                 |              |                    |             |                            |              |
| Fruit, High vs. low                                                                             | -0.07            | 0.70          | -0.34           | 0.60        | -0.07           | 0.07         | <b>-0.17</b>       | <b>0.01</b> | 0.001                      | 0.95         |
| Vegetable, High vs. low                                                                         | -0.07            | 0.67          | 0.12            | 0.85        | 0.04            | 0.37         | 0.08               | 0.22        | -0.011                     | 0.39         |
| <b>Fish, High vs. low</b>                                                                       | <b>0.49</b>      | <b>0.003</b>  | <b>1.33</b>     | <b>0.03</b> | <b>0.11</b>     | <b>0.005</b> | <b>0.14</b>        | <b>0.04</b> | 0.021                      | 0.08         |
| Legume, High vs. low                                                                            | -0.06            | 0.72          | 0.46            | 0.46        | -0.02           | 0.58         | -0.02              | 0.82        | 0.015                      | 0.22         |
| Cereal, High vs. low                                                                            | -0.03            | 0.84          | -0.37           | 0.56        | 0.00            | 0.95         | 0.00               | 0.97        | -0.003                     | 0.80         |
| MUFA/SFA, High vs. low                                                                          | -0.10            | 0.58          | -0.18           | 0.79        | -0.01           | 0.89         | 0.03               | 0.68        | 0.023                      | 0.08         |
| Dairy, Low vs. high                                                                             | 0.20             | 0.25          | 0.53            | 0.43        | 0.01            | 0.84         | 0.06               | 0.38        | -0.019                     | 0.15         |
| <b>Meat, Low vs. high</b>                                                                       | <b>0.57</b>      | <b>0.001</b>  | <b>1.57</b>     | <b>0.01</b> | <b>0.09</b>     | <b>0.02</b>  | 0.11               | 0.12        | <b>0.039</b>               | <b>0.002</b> |
| Moderate Alcohol                                                                                | <b>0.37</b>      | <b>0.05</b>   | <b>1.83</b>     | <b>0.01</b> | <b>0.10</b>     | <b>0.02</b>  | 0.13               | 0.10        | -0.026                     | 0.06         |
| <i>Model 2. Adjusted for age only</i>                                                           |                  |               |                 |             |                 |              |                    |             |                            |              |
| Fruit, High vs. low                                                                             | -0.04            | 0.80          | -0.21           | 0.74        | -0.06           | 0.10         | <b>-0.15</b>       | <b>0.02</b> | 0.000                      | 0.97         |
| Vegetable, High vs. low                                                                         | -0.08            | 0.62          | 0.06            | 0.92        | 0.03            | 0.42         | 0.07               | 0.25        | -0.009                     | 0.47         |
| <b>Fish, High vs. low</b>                                                                       | <b>0.48</b>      | <b>0.004</b>  | <b>1.25</b>     | <b>0.04</b> | <b>0.10</b>     | <b>0.006</b> | <b>0.12</b>        | <b>0.05</b> | 0.020                      | 0.09         |
| Legume, High vs. low                                                                            | -0.01            | 0.95          | 0.74            | 0.23        | 0.00            | 0.96         | 0.04               | 0.51        | 0.023                      | 0.06         |
| Cereal, High vs. low                                                                            | -0.05            | 0.78          | -0.44           | 0.47        | -0.01           | 0.82         | -0.01              | 0.85        | -0.007                     | 0.57         |
| MUFA/SFA, High vs. low                                                                          | -0.12            | 0.51          | -0.29           | 0.66        | -0.01           | 0.71         | 0.01               | 0.89        | <b>0.025</b>               | <b>0.05</b>  |
| Dairy, Low vs. high                                                                             | 0.22             | 0.22          | 0.60            | 0.36        | 0.01            | 0.72         | 0.08               | 0.24        | -0.020                     | 0.13         |
| <b>Meat, Low vs. high</b>                                                                       | <b>0.59</b>      | <b>0.0003</b> | <b>1.66</b>     | <b>0.01</b> | <b>0.09</b>     | <b>0.01</b>  | <b>0.12</b>        | <b>0.04</b> | <b>0.041</b>               | <b>0.001</b> |
| Moderate Alcohol                                                                                | 0.32             | 0.08          | <b>1.59</b>     | <b>0.02</b> | 0.08            | 0.06         | 0.08               | 0.27        | -0.025                     | 0.07         |
| <i>Model 3. Adjusted for age, sex, education, ethnicity, BMI, diabetes, and mean cognition.</i> |                  |               |                 |             |                 |              |                    |             |                            |              |
| Fruit, High vs. low                                                                             | -0.17            | 0.32          | -0.51           | 0.42        | <b>-0.08</b>    | <b>0.03</b>  | <b>-0.16</b>       | <b>0.01</b> | -0.002                     | 0.87         |
| Vegetable, High vs. low                                                                         | -0.04            | 0.82          | 0.39            | 0.53        | 0.05            | 0.19         | 0.07               | 0.24        | -0.006                     | 0.64         |
| <b>Fish, High vs. low</b>                                                                       | <b>0.53</b>      | <b>0.001</b>  | <b>1.26</b>     | <b>0.04</b> | <b>0.11</b>     | <b>0.002</b> | 0.12               | 0.06        | 0.018                      | 0.13         |
| Legume, High vs. low                                                                            | 0.01             | 0.96          | 0.18            | 0.78        | -0.01           | 0.79         | -0.02              | 0.76        | 0.017                      | 0.17         |
| Cereal, High vs. low                                                                            | -0.05            | 0.77          | -0.99           | 0.11        | -0.03           | 0.43         | -0.04              | 0.49        | -0.014                     | 0.27         |
| MUFA/SFA, High vs. low                                                                          | -0.07            | 0.69          | 0.13            | 0.84        | -0.02           | 0.62         | 0.05               | 0.48        | 0.022                      | 0.09         |
| Dairy, Low vs. high                                                                             | 0.21             | 0.24          | 0.76            | 0.25        | 0.03            | 0.43         | 0.07               | 0.31        | -0.011                     | 0.39         |
| <b>Meat, Low vs. high</b>                                                                       | <b>0.51</b>      | <b>0.003</b>  | <b>1.47</b>     | <b>0.02</b> | <b>0.09</b>     | <b>0.01</b>  | 0.11               | 0.09        | <b>0.036</b>               | <b>0.004</b> |
| Moderate Alcohol                                                                                | 0.07             | 0.73          | 1.20            | 0.09        | 0.04            | 0.37         | 0.09               | 0.21        | -0.024                     | 0.09         |

\*All food components entered into model at the same time.

A P-value less than 0.05 was considered significant and indicated in bold.
